# Supplementary material for: The impact of human breast milk components on the infant metabolism
Source: PLoS One. 2018 Jun 1;13(6):e0197713. doi: 10.1371/journal.pone.0197713 (PMC5983411; doi:10.1371/journal.pone.0197713)
Supplement: S3 Table — Breast milk components were measured at month 1 or month 4. Spearman correlation (S) was performed to assess correlation. Correlations coefficients (R), P-values (P) and number of observation (N) are presented for S. Associations were calculated by linear regression models (LM) with the milk compound as independent variable, adjusted for infant sex, breastfeeding status at 4 blood withdrawal (exclusively BF yes/no), and the infant’s age at blood withdrawal. Random intercepts were modelled for batch number and study centre. Estimates (B), P-values (P) and number of observation (N) are presented for the LM. P-values of S and LM were further corrected for multiple testing using Bonferroni’s methods (Padj), this is by dividing the p-value with number of metabolites (n = 184). AA, amino acids; Carn, acylcarnitines; LPC, lysophosphatidylcholines; PC aa, diacyl-phosphatidylcholines; PC ae, acyl-alkyl-phosphatidylcholines SM, sphingomyelins. (XLSX) [file pone.0197713.s005.xlsx]

## Sheet: Tabelle1
	ADIPONECTIN																IGF																INSULIN																LEPTIN
Infant Metabolite	Month 1								Month 4								Month 1								Month 4								Month 1								Month 4								Month 4
	Ns	Rs	Ps	Ps Adj	N	B LM	P LM	P LM Adj	Ns	Rs	Ps	Ps Adj	N	B LM	P LM	P LM Adj	Ns	Rs	Ps	Ps Adj	N	B LM	P LM	P LM Adj	Ns	Rs	Ps	Ps Adj	N	B LM	P LM	P LM Adj	Ns	Rs	Ps	Ps Adj	N	B LM	P LM	P LM Adj	Ns	Rs	Ps	Ps Adj	N	B LM	P LM	P LM Adj	Ns
Ala	117	0.0625604	0.502803	1	117	-1.15145	0.714416	1	124	0.0713811	0.430801	1	124	-1.70076	0.611177	1	118	-0.11325	0.222066	1	118	-5.35858	0.21853	1	121	-0.0590805	0.519769	1	121	-7.75263	0.20074	1	117	-0.116021	0.212877	1	117	-2.66656	0.303734	1	123	0.012252	0.893008	1	123	-0.964939	0.678017	1	89
Arg	117	-0.0519291	0.578181	1	117	-0.121641	0.871138	1	124	0.00376109	0.966931	1	124	0.0388843	0.964951	1	118	0.0172479	0.852932	1	118	0.65096	0.533243	1	121	-0.000929818	0.991924	1	121	-0.455423	0.771537	1	117	-0.117322	0.207755	1	117	-0.632508	0.280731	1	123	0.0950465	0.295689	1	123	-0.0232369	0.968373	1	89
Asn	116	0.289884	0.00159733	0.293909	116	0.260653	0.0525555	1	124	0.185351	0.039306	1	124	0.34341	0.021293	1	117	-0.0864562	0.353998	1	117	0.0706667	0.715545	1	121	-0.061323	0.504019	1	121	-0.0359486	0.896904	1	116	0.20645	0.0261847	1	116	0.108527	0.346514	1	123	0.0863399	0.342339	1	123	-0.0314428	0.765701	1	89
Asp	116	0.0296974	0.751656	1	116	-0.125285	0.601835	1	123	0.100204	0.270136	1	123	0.551193	0.0897645	1	117	0.0465127	0.618498	1	117	0.572722	0.0783392	1	120	-0.0385769	0.675712	1	120	0.0279011	0.962286	1	116	0.154037	0.0987532	1	116	0.201643	0.299606	1	122	0.0551263	0.546455	1	122	0.114271	0.606092	1	88
Carn	135	-0.0556385	0.521089	1	135	-0.0884018	0.532216	1	135	0.140491	0.104108	1	135	0.256383	0.115726	1	136	0.0285199	0.741707	1	136	-0.106215	0.569467	1	132	0.0188911	0.82977	1	132	-0.170053	0.566081	1	135	-0.0192323	0.82478	1	135	0.12538	0.284205	1	134	0.112907	0.193977	1	134	0.0863835	0.432654	1	89
Carn.a.C10.0	135	0.0313238	0.718029	1	135	-0.00060764	0.72818	1	135	0.175073	0.0422583	1	135	0.00236363	0.245162	1	135	-0.16899	0.0500725	1	135	-0.00126747	0.597881	1	132	0.0196164	0.823339	1	132	-0.00113185	0.75547	1	134	0.0999091	0.250732	1	134	0.00206456	0.165795	1	134	0.0886446	0.308427	1	134	0.00160481	0.242455	1	89
Carn.a.C14.0	135	-0.0164569	0.849565	1	135	-0.000538559	0.332483	1	135	0.051356	0.554155	1	135	0.000598532	0.348578	1	136	-0.195119	0.0228232	1	136	-0.000739394	0.333304	1	132	-0.0424548	0.628849	1	132	-0.000838668	0.464936	1	135	0.164948	0.0559003	1	135	0.000760763	0.113887	1	134	0.0298832	0.73178	1	134	-8.02856e-05	0.852074	1	89
Carn.a.C14.1	135	0.00643352	0.940908	1	135	-0.000123517	0.835813	1	135	0.0923984	0.286482	1	135	0.00102112	0.140728	1	136	-0.101778	0.238384	1	136	0.000131326	0.87393	1	132	-0.0639417	0.466373	1	132	-0.000885052	0.475712	1	135	0.0716126	0.409152	1	135	0.000772158	0.134671	1	134	-0.0128381	0.882954	1	134	-0.000180552	0.700261	1	89
Carn.a.C14.2	134	0.0204267	0.814557	1	134	-0.000111437	0.415232	1	134	-0.0121199	0.889459	1	134	6.65136e-05	0.694509	1	135	0.0125282	0.88533	1	135	0.000196538	0.286002	1	131	-0.102814	0.242571	1	131	-0.000319642	0.290997	1	134	0.129957	0.134492	1	134	0.00022752	0.0456653	1	133	0.00348905	0.968206	1	133	-2.41824e-05	0.830364	1	89
Carn.a.C15.0	134	0.0193643	0.824042	1	134	4.96928e-05	0.712882	1	135	0.0759902	0.381039	1	135	0.00015478	0.31496	1	135	-0.0752836	0.385496	1	135	0.00010049	0.577928	1	132	-0.124455	0.155079	1	132	-0.000633122	0.0211416	1	134	-0.0183519	0.833304	1	134	-6.55814e-05	0.56276	1	134	-0.0884925	0.309261	1	134	-0.000188693	0.0642772	1	89
Carn.a.C16.0	135	-0.0098088	0.910002	1	135	-0.000508997	0.550957	1	135	0.0733588	0.397795	1	135	0.000531665	0.604039	1	136	-0.163143	0.057732	1	136	-0.000422447	0.713608	1	132	-0.0902056	0.303656	1	132	-0.00216419	0.252994	1	135	0.175366	0.0419097	1	135	0.00104599	0.150519	1	134	0.0760958	0.382179	1	134	0.000577072	0.403356	1	89
Carn.a.C16.1	134	-0.0103118	0.905762	1	134	-0.00018996	0.473571	1	133	0.0224697	0.797395	1	133	5.13117e-05	0.86458	1	135	-0.147441	0.0879121	1	135	-0.000178142	0.618228	1	130	-0.184738	0.0353666	1	130	-0.000726402	0.178179	1	134	0.0177509	0.838688	1	134	0.000324096	0.146337	1	132	0.0118417	0.8928	1	132	8.87198e-05	0.65986	1	88
Carn.a.C18.0	134	0.00812728	0.925666	1	134	7.52035e-05	0.845929	1	134	0.0594547	0.49499	1	134	0.000710539	0.143808	1	135	-0.102769	0.23558	1	135	0.000403998	0.436268	1	131	-0.0478252	0.587509	1	131	4.20912e-05	0.962578	1	134	0.134847	0.120316	1	134	0.000418271	0.198694	1	133	-0.0122295	0.888888	1	133	-1.63412e-05	0.960367	1	88
Carn.a.C18.1	135	0.0329334	0.704199	1	135	-0.000858916	0.508077	1	135	0.109214	0.207336	1	135	0.000661718	0.679014	1	136	-0.271817	0.00136887	0.251871	136	-0.000792226	0.653002	1	132	-0.170829	0.05018	1	132	-0.00350288	0.245251	1	135	0.124798	0.149252	1	135	0.000863475	0.440708	1	134	0.0194841	0.823183	1	134	0.000548995	0.613898	1	89
Carn.a.C18.2	135	0.0262365	0.762326	1	135	-0.000145635	0.842158	1	135	0.040101	0.644236	1	135	9.57382e-05	0.91296	1	136	-0.104808	0.224625	1	136	-0.000200299	0.840646	1	132	-0.127041	0.146615	1	132	-0.00197492	0.231646	1	135	0.0942007	0.277146	1	135	0.000586531	0.353817	1	134	-0.013691	0.875239	1	134	-3.15052e-05	0.957848	1	89
Carn.a.C2.0	134	0.0710807	0.413941	1	134	-0.00234083	0.892331	1	134	0.238796	0.0054579	1	134	0.0271992	0.141398	1	135	-0.101535	0.241281	1	135	-0.00688177	0.7664	1	131	0.0184756	0.834094	1	131	0.000421239	0.990199	1	134	0.242275	0.00479625	0.882511	134	0.0564228	4.94581e-05	0.00910028	133	0.188567	0.0297298	1	133	0.0205545	0.102442	1	88
Carn.a.C3.0	134	0.0344468	0.692388	1	134	0.0011657	0.601827	1	134	0.101914	0.241301	1	134	0.0028072	0.249663	1	135	-0.0589753	0.496852	1	135	-0.000816124	0.785328	1	131	-0.0923701	0.294023	1	131	-0.0017755	0.696084	1	134	0.0556018	0.523408	1	134	0.00233454	0.218188	1	133	0.107166	0.219533	1	133	0.00206514	0.206949	1	88
Carn.a.C5.0	135	-0.00671642	0.938314	1	135	0.000285478	0.745663	1	135	-0.10122	0.242754	1	135	-0.000517269	0.607156	1	136	-0.146924	0.0878449	1	136	-0.00172441	0.136437	1	132	-0.0439392	0.616889	1	132	0.000946808	0.602973	1	135	-0.0980418	0.257938	1	135	-0.000339163	0.643634	1	134	-0.0933005	0.283606	1	134	-0.00104892	0.11648	1	89
Carn.a.C8.1	134	0.0956745	0.271106	1	134	-0.000483679	0.548363	1	134	0.0632727	0.467655	1	134	0.000152238	0.864977	1	135	-0.0975646	0.260273	1	135	-0.000360449	0.740595	1	131	-0.0607891	0.490362	1	131	0.00247091	0.131144	1	134	0.208878	0.0154325	1	134	0.00152911	0.0236075	1	133	0.164615	0.0582972	1	133	0.000647927	0.279233	1	88
Carn.a.C9.0	128	-0.0583799	0.512248	1	128	-0.000267208	0.489843	1	128	-0.0398708	0.654991	1	128	0.000195313	0.68523	1	129	-0.0291064	0.743338	1	129	-0.000142534	0.774137	1	125	0.0242522	0.788343	1	125	0.000929991	0.276354	1	128	0.0358794	0.68725	1	128	1.40374e-05	0.964672	1	127	-0.0973268	0.276348	1	127	-0.000217773	0.500817	1	84
Cit	116	-0.0275843	0.768811	1	116	-0.0344554	0.72803	1	123	0.0318042	0.72693	1	123	-0.0211062	0.846218	1	117	0.00569514	0.951406	1	117	-0.0671147	0.61719	1	120	-0.104351	0.256692	1	120	-0.236762	0.218447	1	116	-0.0607971	0.516782	1	116	-0.048221	0.534635	1	122	-0.000998025	0.991295	1	122	-0.0452801	0.527154	1	88
Cys	71	0.0492962	0.683088	1	71	0.000428393	0.86913	1	77	0.0439966	0.703991	1	77	-0.000243508	0.923881	1	72	0.138163	0.24711	1	72	0.00200019	0.614068	1	76	0.0182784	0.875466	1	76	-0.00233773	0.58745	1	71	-0.0210768	0.861501	1	71	0.00481699	0.0483492	1	76	0.0649304	0.577351	1	76	-0.000302791	0.889879	1	58
Gln	117	0.0448697	0.630963	1	117	0.012117	0.991657	1	124	0.254797	0.00429205	0.789738	124	4.50618	0.000657086	0.120904	118	-0.209395	0.0228647	1	118	-0.00380848	0.998128	1	121	0.0360706	0.694478	1	121	2.2131	0.368892	1	117	0.263043	0.00416573	0.766495	117	1.69337	0.0671996	1	123	0.209358	0.0201257	1	123	0.864388	0.361081	1	89
Glu	115	0.0456698	0.62792	1	115	0.15855	0.904443	1	122	-6.27868e-05	0.999452	1	122	-0.254945	0.872974	1	116	-0.212404	0.0220751	1	116	-3.30745	0.0694621	1	119	-0.174097	0.058276	1	119	-5.04213	0.0741071	1	115	-0.218635	0.0189021	1	115	-2.81218	0.00712243	1	121	-0.110774	0.226433	1	121	-0.748702	0.474259	1	88
Gly	117	0.0512096	0.583466	1	117	0.201641	0.871593	1	124	0.0551723	0.54278	1	124	0.438202	0.738529	1	118	-0.220243	0.0165532	1	118	-2.06083	0.236947	1	121	-0.10868	0.23539	1	121	-2.19866	0.357741	1	117	-0.0405523	0.664209	1	117	-0.837304	0.411194	1	123	-0.0243958	0.788823	1	123	-0.185802	0.837819	1	89
H1	134	-0.0841781	0.333097	1	134	6.21397	0.721295	1	134	-0.0446964	0.608086	1	134	-2.02755	0.919292	1	135	0.208694	0.0151378	1	135	4.27073	0.85715	1	131	0.113411	0.197131	1	131	40.7917	0.275247	1	134	-0.105647	0.224403	1	134	-7.03748	0.642742	1	133	0.0173636	0.842754	1	133	-9.11214	0.498692	1	88
His	117	0.0729749	0.434266	1	117	0.0657945	0.893199	1	124	0.0967253	0.285211	1	124	0.114975	0.817234	1	118	-0.272409	0.00284253	0.523026	118	-1.04537	0.12736	1	121	-0.0655937	0.474726	1	121	-0.520502	0.56149	1	117	-0.0976885	0.294719	1	117	-0.299335	0.440642	1	123	0.172507	0.0563926	1	123	0.147686	0.669748	1	89
Ile	115	0.0877322	0.351158	1	115	-0.162795	0.573353	1	123	0.209992	0.0197431	1	123	0.48483	0.125915	1	116	-0.187967	0.0433217	1	116	-0.638944	0.104889	1	120	-0.019832	0.82977	1	120	0.0542846	0.924242	1	116	-0.0929697	0.320894	1	116	-0.303629	0.215017	1	122	0.0779338	0.393524	1	122	0.124017	0.57216	1	89
Leu	117	0.0990586	0.287966	1	117	0.00861908	0.991344	1	124	0.113946	0.207629	1	124	0.777773	0.346125	1	118	-0.212832	0.0206726	1	118	-1.47445	0.178721	1	121	-0.0483231	0.598649	1	121	-0.279701	0.852466	1	117	-0.102895	0.26961	1	117	-0.556296	0.361837	1	123	0.0538402	0.554219	1	123	0.294493	0.603943	1	89
Lys	116	0.1025	0.273566	1	116	-0.178589	0.849032	1	123	0.085748	0.345671	1	123	0.565078	0.575994	1	117	-0.160124	0.0846081	1	117	-1.00095	0.444631	1	120	-0.0520655	0.572235	1	120	-1.19011	0.514874	1	116	-0.137366	0.141443	1	116	-1.34582	0.0675576	1	122	0.0440717	0.629798	1	122	-0.121773	0.859534	1	89
lyso.PC.a.C14.0	135	0.209341	0.0149566	1	135	0.0219807	0.060202	1	135	0.0478076	0.581892	1	135	0.00959725	0.505262	1	136	0.0992472	0.250322	1	136	0.0215158	0.154277	1	132	0.0978863	0.264159	1	132	0.0374023	0.15403	1	135	0.0956493	0.269792	1	135	0.00545157	0.569241	1	134	0.0103692	0.905346	1	134	-0.00639134	0.512733	1	89
lyso.PC.a.C16.0	135	0.1	0.248166	1	135	0.329419	0.60637	1	135	0.019186	0.825195	1	135	0.357474	0.631948	1	136	0.00115692	0.989335	1	136	0.16549	0.839132	1	132	-0.0482283	0.582902	1	132	0.330057	0.806699	1	135	-0.00900645	0.917428	1	135	-0.0263724	0.959355	1	134	-0.0210876	0.808899	1	134	-0.476413	0.3441	1	89
lyso.PC.a.C16.1	135	0.174417	0.0431609	1	135	0.0139525	0.122571	1	135	0.00082675	0.992407	1	135	0.00087035	0.939135	1	136	0.0471022	0.586074	1	136	0.00844941	0.485703	1	132	0.0321835	0.714113	1	132	0.00942138	0.653512	1	135	0.0768975	0.375363	1	135	-0.0017965	0.814138	1	134	-0.00128431	0.988249	1	134	-0.00618251	0.420203	1	89
lyso.PC.a.C18.0	135	-0.0436348	0.614886	1	135	-0.165615	0.656353	1	135	-0.0605234	0.485603	1	135	-0.200934	0.645052	1	136	0.0305046	0.724434	1	136	0.302378	0.537268	1	132	-0.051899	0.554519	1	132	0.0888649	0.911125	1	135	-0.0917643	0.289816	1	135	-0.390838	0.200925	1	134	-0.0850062	0.328783	1	134	-0.523449	0.0721618	1	89
lyso.PC.a.C18.1	135	0.118379	0.171278	1	135	0.0219529	0.865072	1	135	-0.00526047	0.951715	1	135	-0.0127713	0.929467	1	136	0.00298891	0.972451	1	136	-0.0186276	0.911482	1	132	-0.0308817	0.725204	1	132	-0.0248719	0.925404	1	135	0.0219272	0.800707	1	135	-0.0587581	0.579927	1	134	-0.0456016	0.600832	1	134	-0.0986803	0.310167	1	89
lyso.PC.a.C18.2	134	0.0780384	0.369651	1	134	0.0242028	0.784945	1	134	-0.0155962	0.858049	1	134	-0.0771407	0.570371	1	135	0.0766079	0.377169	1	135	0.222243	0.0635785	1	131	0.0525709	0.550943	1	131	0.0957276	0.705809	1	134	0.23632	0.00597732	1	134	0.103731	0.174443	1	133	-0.0058661	0.946571	1	133	0.0616075	0.504239	1	88
lyso.PC.a.C18.3	135	0.0716857	0.408201	1	135	3.96777e-05	0.983063	1	135	-0.00974784	0.910658	1	135	-0.00177676	0.490824	1	136	0.0945742	0.273433	1	136	0.00445703	0.0691327	1	132	0.00599527	0.945606	1	132	0.00105157	0.827708	1	135	0.206166	0.0164407	1	135	0.00120993	0.440701	1	134	0.0809039	0.352744	1	134	0.000789751	0.65402	1	89
lyso.PC.a.C18.5	134	0.0486066	0.576589	1	134	-8.42238e-05	0.493714	1	133	0.0360408	0.680447	1	133	2.69361e-05	0.833283	1	135	-0.0110088	0.899158	1	135	-7.40506e-05	0.654048	1	130	-0.00442452	0.960154	1	130	-0.00022568	0.319213	1	134	0.0268458	0.758154	1	134	0.000221633	0.0296825	1	132	-0.0147689	0.866523	1	132	1.14361e-05	0.89494	1	88
lyso.PC.a.C18.6	134	0.0644222	0.459107	1	134	1.99727e-05	0.987795	1	135	0.197942	0.0213741	1	135	0.00208752	0.169075	1	135	-0.065226	0.452285	1	135	-0.000100245	0.953354	1	131	0.065799	0.455247	1	131	-0.000136362	0.962394	1	134	0.0786594	0.366304	1	134	0.000674648	0.53642	1	134	0.123303	0.155785	1	134	0.000608647	0.555014	1	89
lyso.PC.a.C20.0	134	-0.0322124	0.711426	1	134	-0.0020225	0.390523	1	135	-0.00625549	0.942596	1	135	-0.00110182	0.682264	1	135	0.0499176	0.565322	1	135	0.0030424	0.310277	1	132	0.0215939	0.805865	1	132	0.00254296	0.602617	1	135	-0.0656108	0.449617	1	135	-0.00117532	0.539302	1	134	0.0933404	0.283399	1	134	-0.000651326	0.71935	1	89
lyso.PC.a.C20.1	135	0.0299678	0.729752	1	135	-0.000987375	0.785829	1	135	-0.0862966	0.319634	1	135	-0.00661486	0.146059	1	136	-0.0383836	0.65729	1	136	0.00206688	0.655103	1	132	-0.0236732	0.787594	1	132	0.000560591	0.946285	1	135	0.000307287	0.997178	1	135	0.000691187	0.813833	1	134	-0.0232123	0.79007	1	134	-0.00240576	0.436508	1	89
lyso.PC.a.C20.3	134	0.0909463	0.295583	1	134	0.00490167	0.589277	1	134	-0.0699062	0.422192	1	134	-0.00929889	0.403842	1	135	0.0162474	0.851634	1	135	-0.00188051	0.872253	1	131	-0.0118268	0.893346	1	131	-0.00444571	0.828469	1	134	0.0683451	0.432654	1	134	0.00301101	0.684592	1	133	-0.0207558	0.812553	1	133	0.00453723	0.54678	1	88
lyso.PC.a.C20.4	135	0.0781924	0.366895	1	135	0.00133396	0.965137	1	134	-0.0415317	0.633742	1	134	-0.0260758	0.53424	1	136	0.102441	0.235323	1	136	0.0597339	0.149021	1	131	0.0486153	0.581345	1	131	0.0410221	0.597557	1	135	0.096398	0.266043	1	135	0.00557115	0.831854	1	133	0.0189577	0.828531	1	133	0.022186	0.432135	1	89
lyso.PC.a.C20.5	134	0.0372798	0.668527	1	134	0.000693171	0.772699	1	133	-0.00868182	0.920995	1	133	0.00087816	0.748667	1	135	-0.0500785	0.564067	1	135	-0.00177627	0.57894	1	130	-0.045436	0.607733	1	130	-0.00434686	0.378795	1	134	0.0532825	0.540904	1	134	0.0037418	0.0593885	1	132	0.00166969	0.98484	1	132	-0.00164812	0.373151	1	88
lyso.PC.a.C22.1	135	-0.0312018	0.719081	1	135	-0.000871676	0.460816	1	135	0.138567	0.108984	1	135	0.00102718	0.45775	1	136	0.0393783	0.648992	1	136	0.00121665	0.444053	1	132	0.0422539	0.630475	1	132	1.75239e-05	0.994192	1	135	-0.0482514	0.578387	1	135	4.24748e-05	0.965021	1	134	0.131905	0.1287	1	134	0.00144072	0.114177	1	89
lyso.PC.a.C22.5	135	0.0126378	0.8842	1	135	0.0010569	0.713473	1	135	-0.0837383	0.334244	1	135	-0.00152871	0.675634	1	136	0.0979543	0.256576	1	136	0.00265	0.482389	1	132	0.0420869	0.631828	1	132	0.00599158	0.371742	1	135	-0.0135694	0.875873	1	135	0.000233113	0.92223	1	134	0.0766494	0.378716	1	134	0.00196769	0.42194	1	89
lyso.PC.a.C22.6	135	0.195839	0.0229637	1	135	0.0148854	0.245998	1	135	-0.034982	0.687097	1	135	-0.019406	0.215151	1	136	-0.0282026	0.744481	1	136	0.00414977	0.814469	1	132	-0.0617294	0.481967	1	132	-0.0443276	0.12224	1	135	0.0843309	0.330822	1	135	0.0129853	0.238055	1	134	-0.0546117	0.530842	1	134	-0.0152737	0.144384	1	89
lyso.PC.a.C15.0	135	0.0565603	0.5142	1	135	0.00579603	0.325191	1	135	0.0292338	0.736434	1	135	0.00387671	0.569564	1	136	-0.067798	0.432888	1	136	-0.00526126	0.498691	1	132	-0.0355151	0.686004	1	132	0.00321014	0.798465	1	135	-0.0554361	0.523076	1	135	-0.00413741	0.396621	1	134	-0.070173	0.420419	1	134	-0.00722203	0.113695	1	89
lyso.PC.a.C17.0	135	0.0517023	0.551027	1	135	0.0121768	0.414683	1	135	0.0333895	0.700645	1	135	0.0165465	0.344709	1	136	-0.101447	0.239925	1	136	-0.0254615	0.193133	1	132	-0.0706493	0.420829	1	132	-0.00891369	0.782234	1	135	-0.0859039	0.321849	1	135	-0.0169284	0.170112	1	134	-0.0472251	0.587921	1	134	-0.0150848	0.199193	1	89
lyso.PC.a.C17.1	135	0.0878256	0.310689	1	135	0.00237054	0.375563	1	135	0.0259219	0.765371	1	135	0.00262897	0.409439	1	136	-0.0924965	0.284158	1	136	-0.00306915	0.366766	1	132	-0.0136029	0.876975	1	132	-0.000757437	0.89638	1	135	-0.0217174	0.802574	1	135	-0.00124507	0.568913	1	134	0.0187933	0.829355	1	134	-0.0017973	0.403317	1	89
Met	116	0.0514883	0.583071	1	116	-0.0547908	0.676172	1	123	0.179474	0.0470004	1	123	0.201346	0.171705	1	117	-0.190216	0.0399561	1	117	-0.294719	0.102527	1	120	-0.00665354	0.942503	1	120	-0.0277287	0.917413	1	116	-0.0957033	0.306809	1	116	-0.160057	0.131907	1	122	0.0226348	0.804547	1	122	-0.0503831	0.613538	1	89
Orn	116	0.116084	0.214634	1	116	0.304199	0.694435	1	123	0.141685	0.118001	1	123	0.906047	0.325857	1	117	-0.168373	0.0695762	1	117	-1.80279	0.0953233	1	120	0.0483304	0.600141	1	120	-0.0554974	0.973097	1	116	-0.0226202	0.80954	1	116	-0.801876	0.218135	1	122	0.0206225	0.82162	1	122	-0.0873818	0.890932	1	89
PC.aa.C18.0	135	0.0282216	0.74494	1	135	0.00182125	0.495593	1	135	0.029146	0.737197	1	135	0.00162035	0.597608	1	136	-0.0678719	0.432386	1	136	-0.00187815	0.585254	1	132	-0.0615207	0.483453	1	132	0.000283536	0.960038	1	135	-0.00991856	0.9091	1	135	-0.0015052	0.490171	1	134	-0.0287784	0.741338	1	134	-0.00236993	0.255984	1	89
PC.aa.C20.0	134	-0.0240178	0.782702	1	134	-9.60144e-05	0.928002	1	134	0.0545344	0.531424	1	134	0.000982265	0.431661	1	135	-0.12973	0.133704	1	135	-0.00298415	0.031494	1	131	0.0490717	0.577798	1	131	0.00104097	0.635665	1	134	-0.00460854	0.957853	1	134	0.00064578	0.467573	1	133	0.0439651	0.615325	1	133	0.000705626	0.402751	1	89
PC.aa.C28.2	135	0.0644084	0.457505	1	135	0.000258246	0.699669	1	135	0.0491489	0.571332	1	135	0.000775083	0.313272	1	136	0.00321791	0.970341	1	136	-0.000485434	0.598406	1	132	0.129558	0.138712	1	132	0.0020934	0.134469	1	135	0.0687129	0.428428	1	135	0.000540945	0.348869	1	134	-0.00216711	0.980174	1	134	-0.000245497	0.636161	1	89
PC.aa.C30.0	134	-0.0159329	0.854846	1	134	-0.00423739	0.757613	1	134	0.0489034	0.574709	1	134	0.000189472	0.990283	1	135	-0.0425987	0.623729	1	135	-0.00536768	0.771935	1	131	0.147693	0.092285	1	131	0.0459904	0.0904009	1	134	0.205494	0.0172208	1	134	0.0271559	0.0183416	1	133	0.117761	0.177027	1	133	0.00658611	0.527328	1	88
PC.aa.C30.2	134	0.00174316	0.984053	1	134	0.000770737	0.73882	1	134	0.0366439	0.674229	1	134	0.00231032	0.391325	1	135	-0.0459838	0.596393	1	135	-0.00262555	0.38092	1	131	0.0366069	0.678062	1	131	0.00197727	0.691482	1	134	0.0738963	0.396127	1	134	0.00300707	0.11528	1	133	0.0185547	0.832121	1	133	-0.000799588	0.660799	1	89
PC.aa.C30.3	135	-0.00501902	0.953889	1	135	0.000102808	0.872056	1	135	0.0117964	0.891986	1	135	0.00052702	0.519771	1	136	0.0737448	0.393532	1	136	-0.000199635	0.816929	1	132	0.105856	0.227036	1	132	0.00182877	0.218751	1	135	0.0625501	0.471085	1	135	0.000782224	0.146663	1	134	-0.0140102	0.872355	1	134	-0.000155784	0.778163	1	89
PC.aa.C30.4	133	-0.000362167	0.996718	1	133	-0.00020206	0.42903	1	132	0.192755	0.0268061	1	132	0.000527645	0.0714136	1	134	0.0992042	0.254108	1	134	0.000210701	0.542157	1	130	0.11205	0.204361	1	130	0.000149813	0.778767	1	133	0.0291086	0.739437	1	133	0.00019413	0.387248	1	131	-0.0919181	0.296402	1	131	-0.000306003	0.141327	1	87
PC.aa.C32.0	134	-0.0140825	0.871552	1	134	-0.0170517	0.763309	1	134	-0.0121249	0.889414	1	134	0.0133387	0.831082	1	135	-0.00638481	0.941412	1	135	-0.0603554	0.400074	1	131	-0.0224873	0.798766	1	131	-0.0161884	0.884283	1	134	0.145788	0.0928028	1	134	0.111648	0.0140759	1	133	0.0376629	0.666903	1	133	-0.00428154	0.919028	1	88
PC.aa.C32.1	135	0.0670081	0.439522	1	135	0.0192165	0.49555	1	135	0.0046337	0.957462	1	135	-0.00626353	0.833955	1	136	-0.0463437	0.592128	1	136	-0.00878587	0.817589	1	132	0.133498	0.127004	1	132	0.0728878	0.181709	1	135	0.171337	0.0469263	1	135	0.0349911	0.145983	1	134	0.0727815	0.403311	1	134	-0.00272364	0.892419	1	89
PC.aa.C32.2	135	0.0458102	0.59735	1	135	0.000528327	0.942745	1	135	0.0624013	0.472143	1	135	0.00675481	0.406788	1	136	-0.0172226	0.842255	1	136	-0.00462977	0.638324	1	132	0.147623	0.0911831	1	132	0.0262283	0.0714996	1	135	0.143328	0.0972357	1	135	0.0105112	0.0871531	1	134	0.0076435	0.930153	1	134	-0.00203909	0.709515	1	89
PC.aa.C32.3	135	0.039162	0.651625	1	135	0.00218701	0.412678	1	135	0.0162204	0.851877	1	135	0.00235934	0.432267	1	136	0.0740859	0.391342	1	136	0.000859003	0.808001	1	132	0.144408	0.0985313	1	132	0.00617606	0.258231	1	135	0.0509439	0.557344	1	135	0.0015491	0.493083	1	134	-0.0702528	0.419889	1	134	-0.000483717	0.813585	1	89
PC.aa.C34.0	135	0.0114623	0.894908	1	135	0.00336591	0.870583	1	135	0.0309604	0.72149	1	135	0.00957009	0.6973	1	136	-0.0124351	0.88575	1	136	-0.00792901	0.763437	1	132	-0.0146986	0.867152	1	132	-0.00318155	0.942762	1	135	-0.0243269	0.779427	1	135	0.00144055	0.9311	1	134	-0.025953	0.76596	1	134	-0.00812884	0.625055	1	89
PC.aa.C34.1	135	0.166003	0.0544135	1	135	0.43713	0.363249	1	135	0.0783851	0.366168	1	135	0.163812	0.759026	1	136	-0.0223274	0.7964	1	136	-0.08596	0.895066	1	132	0.0589039	0.502284	1	132	0.711723	0.467657	1	135	0.158851	0.0657365	1	135	0.696348	0.0895525	1	134	0.097732	0.261258	1	134	0.135186	0.704258	1	89
PC.aa.C34.2	135	0.0602966	0.486766	1	135	0.445965	0.469484	1	135	0.0192469	0.824649	1	135	-0.254134	0.727628	1	136	0.0439439	0.611464	1	136	0.220001	0.791697	1	132	0.0727546	0.407084	1	132	0.909398	0.493915	1	135	0.202261	0.0186438	1	135	1.3676	0.00753704	1	134	0.0661605	0.447541	1	134	0.101655	0.834764	1	89
PC.aa.C34.3	135	0.159384	0.0648829	1	135	0.050713	0.3322	1	135	0.0982588	0.256881	1	135	0.0496313	0.412284	1	136	0.0497429	0.565225	1	136	0.100417	0.153926	1	132	-0.00994516	0.90989	1	132	0.00755636	0.946551	1	135	0.16463	0.05638	1	135	0.0560828	0.209935	1	134	0.0788939	0.364872	1	134	0.00975873	0.811791	1	89
PC.aa.C34.4	135	0.0831968	0.336954	1	135	0.00184098	0.483788	1	135	-0.0333919	0.700624	1	135	0.00126942	0.669396	1	136	0.0515438	0.55121	1	136	0.000335762	0.92413	1	132	0.138742	0.112616	1	132	0.0105342	0.0485522	1	135	0.115664	0.181585	1	135	0.00173952	0.432182	1	134	-0.053285	0.540885	1	134	-0.00193281	0.332382	1	89
PC.aa.C34.5	135	0.100283	0.246826	1	135	0.000350889	0.508306	1	135	0.0257926	0.766508	1	135	0.000136497	0.811396	1	136	-0.0106914	0.901684	1	136	-0.000512511	0.464892	1	132	0.0722042	0.410652	1	132	0.000699543	0.496129	1	135	0.0582944	0.501843	1	135	0.000396371	0.36479	1	134	0.0202621	0.816245	1	134	-3.57559e-05	0.926322	1	89
PC.aa.C36.0	135	0.00452151	0.958457	1	135	0.0501727	0.467879	1	135	0.0146547	0.866034	1	135	0.0845496	0.346297	1	136	0.144217	0.0939171	1	136	0.011317	0.905354	1	132	0.070151	0.424121	1	132	0.091281	0.584939	1	135	0.0806752	0.352288	1	135	0.113499	0.0575524	1	134	-0.00239654	0.978075	1	134	-0.0287704	0.63381	1	89
PC.aa.C36.1	135	0.109453	0.206066	1	135	0.0753105	0.624669	1	135	0.0403181	0.642443	1	135	-0.0388073	0.8271	1	136	-0.0229786	0.790597	1	136	-0.0407033	0.844718	1	132	0.0081111	0.926456	1	132	0.0031529	0.992295	1	135	0.114045	0.187817	1	135	0.111819	0.394635	1	134	0.0668737	0.442649	1	134	-0.0482085	0.685972	1	89
PC.aa.C36.2	134	0.026741	0.758781	1	134	0.128296	0.827582	1	134	-0.0513174	0.555952	1	134	-0.673223	0.351163	1	135	0.0244369	0.778455	1	135	-0.169633	0.829513	1	131	0.0124274	0.887965	1	131	-0.267822	0.839185	1	134	0.143795	0.0974025	1	134	0.922261	0.060227	1	133	-0.025969	0.766687	1	133	-0.405592	0.402583	1	88
PC.aa.C36.3	134	0.0262572	0.763015	1	134	0.0693236	0.748358	1	134	-0.0660882	0.448039	1	134	-0.207249	0.424602	1	135	-0.0266464	0.759011	1	135	-0.138925	0.629123	1	131	0.0347892	0.693223	1	131	0.100208	0.8332	1	134	0.134837	0.120343	1	134	0.312257	0.0826558	1	133	-0.0149968	0.863965	1	133	-0.0586986	0.735625	1	88
PC.aa.C36.4	135	0.0237733	0.784065	1	135	0.0551873	0.855461	1	135	-0.0332822	0.701561	1	135	-0.373076	0.325975	1	136	0.0094462	0.913086	1	136	0.00434948	0.991439	1	132	0.063206	0.471528	1	132	0.622719	0.369353	1	135	0.0603771	0.48666	1	135	0.376673	0.1368	1	134	0.0143593	0.869202	1	134	0.0414525	0.869608	1	89
PC.aa.C36.5	135	0.091752	0.289488	1	135	0.00590037	0.864748	1	135	-0.0221418	0.798798	1	135	-0.0215565	0.600087	1	136	-0.0937488	0.27766	1	136	-0.0291667	0.530353	1	132	0.0328931	0.708092	1	132	0.0550246	0.465412	1	135	0.0756098	0.383434	1	135	0.067947	0.0178068	1	134	0.0207609	0.811805	1	134	-0.0179857	0.512604	1	89
PC.aa.C36.6	135	0.134675	0.11931	1	135	0.00240278	0.676595	1	135	0.0225637	0.795048	1	135	0.00159844	0.815057	1	136	-0.142738	0.0973719	1	136	-0.00563712	0.468985	1	132	-0.041993	0.63259	1	132	-0.00127127	0.919091	1	135	0.145349	0.0925595	1	135	0.00658523	0.17691	1	134	0.0178756	0.83757	1	134	-0.0013063	0.775944	1	89
PC.aa.C38.0	135	-0.0050678	0.953441	1	135	0.029086	0.51402	1	135	0.00309726	0.97156	1	135	0.0255352	0.662053	1	136	0.14831	0.08486	1	136	0.0198643	0.748793	1	132	0.0633104	0.470795	1	132	0.0202731	0.854376	1	135	0.0525218	0.545185	1	135	0.0506601	0.19695	1	134	-0.047058	0.589244	1	134	-0.0409812	0.299642	1	89
PC.aa.C38.1	135	0.00296556	0.972754	1	135	0.0131028	0.623491	1	135	0.0806044	0.352711	1	135	0.0287312	0.367553	1	136	0.131052	0.128317	1	136	0.0230015	0.529177	1	132	0.0873802	0.319114	1	132	0.0362955	0.530015	1	135	0.097215	0.261993	1	135	0.0475263	0.0360159	1	134	0.00885548	0.919113	1	134	-0.00621593	0.771567	1	89
PC.aa.C38.2	135	0.044303	0.609476	1	135	0.0194498	0.633807	1	135	-0.00592138	0.945657	1	135	0.018739	0.691881	1	136	0.160454	0.0620358	1	136	0.051228	0.357639	1	132	0.0393058	0.654538	1	132	0.0276965	0.748103	1	135	0.0725052	0.403323	1	135	0.0337842	0.336196	1	134	0.0304194	0.727156	1	134	-0.0168353	0.596137	1	89
PC.aa.C38.3	134	-0.0159129	0.855026	1	134	0.0134933	0.898108	1	134	-0.109503	0.207849	1	134	-0.190293	0.132987	1	135	-0.0128403	0.882493	1	135	-0.146517	0.274803	1	131	-0.0153127	0.862186	1	131	-0.00738908	0.974796	1	134	0.0319755	0.713791	1	134	0.0997877	0.247245	1	133	-0.0617879	0.479864	1	133	-0.0619355	0.468574	1	88
PC.aa.C38.4	135	0.0147059	0.865414	1	135	0.0298594	0.911282	1	135	-0.0797045	0.35813	1	135	-0.538958	0.127314	1	136	0.0332192	0.701031	1	136	-0.0491002	0.890348	1	132	0.0529139	0.546792	1	132	0.301709	0.643639	1	135	-0.00372647	0.965785	1	135	0.199022	0.373315	1	134	-0.0280503	0.74766	1	134	-0.0925807	0.69647	1	89
PC.aa.C38.5	135	0.0536533	0.536084	1	135	0.0467941	0.596292	1	135	-0.0629013	0.468594	1	135	-0.113441	0.290011	1	136	-0.0516035	0.550749	1	136	-0.0728121	0.539034	1	132	0.0443906	0.613273	1	132	0.145312	0.461716	1	135	0.0125915	0.884754	1	135	0.0687529	0.356341	1	134	-0.000830435	0.992402	1	134	-0.0269853	0.706468	1	89
PC.aa.C38.6	133	0.117041	0.179483	1	133	0.0651172	0.668527	1	133	0.0096459	0.912255	1	133	-0.251709	0.171362	1	134	-0.108246	0.213145	1	134	-0.0569178	0.779005	1	130	-0.0198585	0.822558	1	130	-0.0300943	0.927838	1	133	0.049543	0.571181	1	133	0.195463	0.152956	1	132	0.00538996	0.951091	1	132	-0.0557915	0.649681	1	87
PC.aa.C40.0	135	0.0443079	0.609436	1	135	0.000756691	0.925392	1	135	0.0578432	0.505164	1	135	0.0076633	0.415483	1	136	0.0350869	0.685089	1	136	0.00321365	0.775695	1	132	0.0620216	0.479892	1	132	0.00762743	0.660459	1	135	0.0421252	0.627595	1	135	0.00513993	0.473174	1	134	0.0157633	0.856544	1	134	-0.00284813	0.657202	1	89
PC.aa.C40.1	135	0.019125	0.825535	1	135	0.0161755	0.482841	1	135	0.00723345	0.933641	1	135	0.0126764	0.656021	1	136	0.131806	0.126116	1	136	0.0074383	0.814205	1	132	0.000834851	0.99242	1	132	0.000942381	0.985954	1	135	0.00700176	0.935762	1	135	0.00433035	0.829422	1	134	-0.0288558	0.740668	1	134	-0.021291	0.269914	1	89
PC.aa.C40.2	135	0.0349673	0.686862	1	135	0.00992422	0.788309	1	135	0.0440909	0.611613	1	135	0.0321509	0.465711	1	136	0.154963	0.0716427	1	136	0.0438353	0.39015	1	132	0.0223375	0.799319	1	132	0.0247668	0.765593	1	135	-0.0112404	0.897048	1	135	-0.00696973	0.82967	1	134	0.00843154	0.922973	1	134	-0.0200705	0.504204	1	89
PC.aa.C40.3	135	0.0334016	0.700194	1	135	0.0030089	0.893659	1	135	0.0273657	0.752714	1	135	0.0141883	0.594685	1	136	0.0942163	0.27526	1	136	0.018661	0.545791	1	132	-0.00200886	0.981762	1	132	0.00163137	0.973659	1	135	0.0211321	0.807791	1	135	0.00397506	0.839917	1	134	0.0100774	0.907997	1	134	-0.00516165	0.77619	1	89
PC.aa.C40.4	135	0.124656	0.149562	1	135	0.0102443	0.542634	1	135	-0.045698	0.598679	1	135	-0.00588488	0.774004	1	136	-0.00528606	0.951298	1	136	-0.0133737	0.547554	1	132	-0.0546775	0.53349	1	132	-0.0101836	0.78247	1	135	-0.0291801	0.7369	1	135	0.00760525	0.592637	1	134	0.0368035	0.672891	1	134	0.000578723	0.966652	1	89
PC.aa.C40.5	135	0.0658619	0.447401	1	135	0.0104007	0.664009	1	135	-0.0418838	0.62957	1	135	-0.0260257	0.388275	1	136	-0.00283148	0.973901	1	136	-0.0208616	0.512699	1	132	0.0212991	0.808464	1	132	0.0305429	0.580774	1	135	-0.0370745	0.669447	1	135	0.0149676	0.455901	1	134	-0.010843	0.901042	1	134	-0.0117617	0.560041	1	89
PC.aa.C40.6	133	0.132201	0.129186	1	133	0.0741392	0.256147	1	133	0.00448629	0.959126	1	133	-0.0613234	0.454907	1	134	-0.112693	0.194828	1	134	-0.0305187	0.728776	1	130	-0.0405281	0.647084	1	130	-0.0256563	0.862226	1	133	0.00603698	0.945017	1	133	0.04449	0.454861	1	132	-0.0231199	0.792445	1	132	-0.0570367	0.293664	1	88
PC.aa.C42.0	135	0.000526778	0.995178	1	135	-0.00117706	0.812987	1	135	-0.0173764	0.841455	1	135	-0.00118323	0.850076	1	136	0.144723	0.0927583	1	136	0.00807711	0.247647	1	132	0.0631121	0.472188	1	132	0.00484373	0.671959	1	135	-0.0408107	0.638381	1	135	0.00144748	0.745771	1	134	-0.0834824	0.337558	1	134	-0.00590096	0.162173	1	89
PC.aa.C42.1	135	0.0267193	0.758086	1	135	0.000317268	0.938569	1	135	0.0907522	0.295191	1	135	0.0045592	0.345426	1	136	0.0872581	0.312432	1	136	0.00605053	0.293281	1	132	0.0964383	0.271324	1	132	0.00933659	0.276146	1	135	0.0572872	0.509273	1	135	0.00481851	0.184602	1	134	-0.0019701	0.981976	1	134	-0.000606525	0.852903	1	89
PC.aa.C42.2	135	0.0762267	0.379092	1	135	0.00540004	0.286515	1	135	0.0765463	0.377554	1	135	0.00279094	0.651948	1	136	0.0824253	0.34009	1	136	0.00173219	0.808685	1	132	0.0374639	0.669755	1	132	-0.000443898	0.968087	1	135	-0.0152327	0.860803	1	135	0.00322899	0.473519	1	134	0.0153493	0.860273	1	134	-0.00113425	0.787	1	89
PC.aa.C42.4	135	0.129934	0.132974	1	135	0.00518661	0.542424	1	135	-0.0181617	0.83439	1	135	-0.00580867	0.579136	1	136	-0.111274	0.197154	1	136	-0.0154703	0.17527	1	132	-0.124155	0.156085	1	132	-0.0267314	0.158436	1	135	-0.0545045	0.530094	1	135	-0.00144149	0.842959	1	134	0.0288383	0.740819	1	134	-0.00630452	0.369213	1	89
PC.aa.C42.5	135	0.0395035	0.648789	1	135	-0.00217899	0.558294	1	135	-0.0110209	0.899048	1	135	-0.0014065	0.765324	1	136	-0.043109	0.618255	1	136	-0.00370202	0.464964	1	132	-0.0601458	0.493299	1	132	-0.00717917	0.406018	1	135	0.011016	0.899092	1	135	0.000752392	0.81425	1	134	1.74566e-05	0.99984	1	134	-0.00160232	0.613786	1	89
PC.aa.C42.6	135	-0.102468	0.236639	1	135	-0.00716569	0.142015	1	135	-0.0517218	0.551333	1	135	0.0011492	0.844547	1	136	-0.0328637	0.70408	1	136	-0.00186084	0.784719	1	132	-0.0146777	0.867339	1	132	-0.00228897	0.828391	1	135	0.0582944	0.501843	1	135	0.00357283	0.40794	1	134	-0.0545618	0.531218	1	134	-0.00345773	0.387312	1	89
PC.aa.C43.4	135	0.102907	0.234629	1	135	0.000331502	0.793221	1	135	0.042413	0.625244	1	135	0.000278088	0.869246	1	136	-0.0708251	0.412581	1	136	-0.00100884	0.558753	1	132	-0.0803753	0.359593	1	132	-0.00101592	0.74205	1	135	0.0385695	0.656945	1	135	0.000825605	0.447957	1	134	0.0463323	0.595006	1	134	-0.000432464	0.703469	1	89
PC.ae.C44.6	135	0.055058	0.525451	1	135	0.000475586	0.873608	1	135	-0.0547557	0.528197	1	135	-0.00239969	0.516275	1	136	0.0522189	0.546001	1	136	0.000167247	0.966102	1	132	0.0743904	0.39659	1	132	-0.00119292	0.86029	1	135	0.0655522	0.450022	1	135	0.00395961	0.109225	1	134	-0.0528336	0.544324	1	134	-0.00360276	0.1459	1	89
PC.ae.C44.5	135	0.0501122	0.563354	1	135	-0.000109258	0.955609	1	135	0.00519706	0.952296	1	135	-0.000710439	0.752124	1	136	-0.0663477	0.442817	1	136	-0.000818137	0.760983	1	132	0.0230654	0.792924	1	132	0.000684233	0.869963	1	135	0.0999782	0.24861	1	135	0.00218192	0.199759	1	134	0.0172496	0.843184	1	134	-0.00125876	0.407787	1	89
PC.ae.C30.0	135	0.077329	0.372222	1	135	0.00237448	0.384745	1	135	0.0784827	0.36557	1	135	0.00332662	0.26388	1	136	0.0246961	0.775346	1	136	0.00210447	0.570988	1	132	0.162183	0.063178	1	132	0.00879866	0.0959501	1	135	0.184246	0.0324208	1	135	0.00463893	0.0461729	1	134	0.116273	0.180931	1	134	0.00237634	0.240526	1	89
PC.ae.C30.2	135	0.0131743	0.87932	1	135	0.00035169	0.819666	1	135	0.0414984	0.632728	1	135	0.00122586	0.489045	1	136	-0.0426558	0.621955	1	136	-0.00145871	0.490411	1	132	0.00665794	0.939604	1	132	0.00011265	0.972083	1	135	0.0349552	0.687324	1	135	0.00108179	0.421012	1	134	-0.00528686	0.951656	1	134	-4.73725e-05	0.968552	1	89
PC.ae.C32.0	135	0.0235977	0.785622	1	135	0.00361884	0.713863	1	135	-0.0328359	0.705377	1	135	-0.00165931	0.887705	1	136	-0.0360196	0.677179	1	136	-0.0141269	0.259128	1	132	0.000185233	0.998318	1	132	0.00430512	0.84198	1	135	0.189774	0.0274857	1	135	0.0173854	0.0293587	1	134	0.0867069	0.319163	1	134	0.000386333	0.961248	1	89
PC.ae.C32.1	135	0.0156521	0.856842	1	135	0.00110205	0.923473	1	135	0.00106331	0.990234	1	135	0.00249696	0.847559	1	136	0.00949868	0.912605	1	136	-0.00573529	0.701788	1	132	0.0459742	0.600657	1	132	0.0107351	0.649488	1	135	0.155724	0.0713029	1	135	0.0191688	0.041884	1	134	0.0525269	0.546667	1	134	0.00222321	0.798768	1	89
PC.ae.C32.2	135	-0.0107063	0.901805	1	135	0.000160565	0.969006	1	135	0.0489294	0.573054	1	135	0.00196934	0.663734	1	136	-0.00949391	0.912649	1	136	-0.00125217	0.827419	1	132	0.0942129	0.282589	1	132	0.00759679	0.359187	1	135	0.0866575	0.317607	1	135	0.00378758	0.293567	1	134	-0.00226686	0.979261	1	134	-0.000582694	0.848724	1	89
PC.ae.C34.0	135	0.0291825	0.736569	1	135	0.00318984	0.575867	1	135	0.0533924	0.538532	1	135	0.00748546	0.228677	1	136	-0.0867429	0.315309	1	136	-0.0108088	0.145589	1	132	-0.0128515	0.883721	1	132	-0.000510474	0.964151	1	135	0.076856	0.375621	1	135	0.00480092	0.316675	1	134	0.0464994	0.593677	1	134	0.00127256	0.762617	1	89
PC.ae.C34.1	134	0.115051	0.185357	1	134	0.0106958	0.649673	1	134	-0.00145638	0.986675	1	134	-0.00731948	0.773572	1	135	0.00625067	0.94264	1	135	-0.00207381	0.947663	1	131	-0.00620302	0.943941	1	131	-0.0115512	0.804075	1	134	0.20709	0.0163562	1	134	0.0379221	0.0555621	1	133	0.0631779	0.470019	1	133	0.00178416	0.916713	1	88
PC.ae.C34.2	135	0.0573993	0.507971	1	135	0.00959394	0.526097	1	135	-0.0537217	0.536027	1	135	-0.0103409	0.560131	1	136	0.0492729	0.568909	1	136	-0.00022568	0.991037	1	132	0.0593814	0.49882	1	132	0.022776	0.479407	1	135	0.193342	0.0246535	1	135	0.0255267	0.0400882	1	134	0.00262597	0.975977	1	134	-0.00113833	0.923783	1	89
PC.ae.C34.3	135	0.0352356	0.684587	1	135	0.00598002	0.610885	1	135	-0.0409717	0.637056	1	135	-0.00845427	0.540327	1	136	0.101427	0.240014	1	136	0.0104484	0.491017	1	132	0.0833964	0.341759	1	132	0.0213356	0.391283	1	135	0.138065	0.110286	1	135	0.0213508	0.0247364	1	134	-0.0560905	0.519758	1	134	-0.00314366	0.734972	1	89
PC.ae.C34.4	135	0.075061	0.386441	1	135	0.000477886	0.69176	1	135	0.0730271	0.399938	1	135	0.0007556	0.593458	1	136	0.0678385	0.432613	1	136	0.00101186	0.516397	1	132	0.094226	0.282522	1	132	0.00227826	0.379862	1	135	0.0902962	0.297634	1	135	0.000715004	0.472309	1	134	0.00424445	0.96118	1	134	-0.000628017	0.513369	1	89
PC.ae.C36.0	135	0.273754	0.00136425	0.251023	135	0.0124335	0.00974497	1	135	0.186641	0.0301979	1	135	0.00890821	0.121383	1	136	-0.0099543	0.908431	1	136	0.00415445	0.540498	1	132	0.0482648	0.582617	1	132	-0.000366157	0.972722	1	135	0.11413	0.187485	1	135	0.00763014	0.0744061	1	134	0.112595	0.195219	1	134	0.00337077	0.391778	1	89
PC.ae.C36.1	135	0.158389	0.0665907	1	135	0.0881375	0.333414	1	135	0.0933715	0.281415	1	135	0.106888	0.30845	1	136	0.0300299	0.728553	1	136	0.138412	0.263579	1	132	-0.0603649	0.491723	1	132	-0.0816198	0.676313	1	135	0.136977	0.113147	1	135	0.073999	0.34435	1	134	0.0891159	0.305851	1	134	0.0216618	0.761131	1	89
PC.ae.C36.2	135	0.0524876	0.544988	1	135	0.0477626	0.332581	1	135	0.0319457	0.713009	1	135	0.0528622	0.349039	1	136	0.137459	0.110529	1	136	0.0227455	0.734851	1	132	0.0817032	0.351684	1	132	0.040716	0.699347	1	135	0.125598	0.146641	1	135	0.0836533	0.0471439	1	134	-0.00773327	0.929335	1	134	-0.0161219	0.675324	1	89
PC.ae.C36.3	135	0.055458	0.522444	1	135	0.004989	0.655885	1	135	-0.0422789	0.626339	1	135	-0.0108141	0.408072	1	136	0.0160848	0.852555	1	136	0.00220875	0.882733	1	132	0.0304799	0.728639	1	132	0.00703698	0.768542	1	135	0.10497	0.225645	1	135	0.0077194	0.412623	1	134	-0.045028	0.605424	1	134	-0.00575913	0.512145	1	89
PC.ae.C36.4	135	-0.0113891	0.895576	1	135	-0.00376672	0.890364	1	135	-0.0778925	0.369197	1	135	-0.0401291	0.233029	1	136	-0.0375964	0.663888	1	136	-0.0146575	0.688902	1	132	0.0311347	0.723043	1	132	0.0400067	0.516419	1	135	0.0530412	0.541211	1	135	0.0290666	0.204107	1	134	0.0260403	0.765196	1	134	-0.00186116	0.934202	1	89
PC.ae.C36.5	135	-0.0120769	0.889308	1	135	-0.00809188	0.765835	1	135	-0.0426837	0.623036	1	135	-0.040799	0.214884	1	136	-0.0136469	0.874703	1	136	0.00127191	0.972166	1	132	0.0828903	0.344707	1	132	0.0363969	0.547449	1	135	0.0345918	0.690408	1	135	0.025969	0.255205	1	134	-0.00109977	0.989938	1	134	-0.0129132	0.557383	1	89
PC.ae.C36.6	135	0.0910448	0.293234	1	135	0.000620072	0.803128	1	135	-0.052634	0.544326	1	135	-0.00138177	0.638277	1	136	-0.144162	0.0940435	1	136	-0.00271994	0.415932	1	132	0.00194103	0.982377	1	132	0.00108368	0.841281	1	135	0.0321115	0.711585	1	135	0.00205972	0.326419	1	134	0.0353421	0.685177	1	134	-0.00102252	0.603741	1	89
PC.ae.C38.0	135	0.177544	0.0395097	1	135	0.019911	0.343585	1	135	0.0195152	0.822245	1	135	-0.0173144	0.498218	1	136	-0.153422	0.0745453	1	136	-0.0276351	0.330663	1	132	0.000936598	0.991496	1	132	-0.0026278	0.954868	1	135	0.0721516	0.405626	1	135	0.0385778	0.0287567	1	134	0.0192172	0.825566	1	134	-0.00263105	0.877821	1	89
PC.ae.C38.2	135	0.0840552	0.331979	1	135	0.040466	0.477402	1	135	0.0478759	0.581352	1	135	0.055678	0.381952	1	136	0.0718102	0.406094	1	136	0.0655999	0.39419	1	132	-0.0219122	0.803061	1	132	-0.0287684	0.808863	1	135	0.0638231	0.462089	1	135	0.023169	0.635893	1	134	0.00477812	0.956303	1	134	-0.0268275	0.536749	1	89
PC.ae.C38.3	135	0.101346	0.241831	1	135	0.0330261	0.638454	1	135	0.00658229	0.939603	1	135	0.00528374	0.945813	1	136	0.0423242	0.624668	1	136	-0.017731	0.844232	1	132	0.0243698	0.781499	1	132	0.0804396	0.572209	1	135	0.050083	0.564032	1	135	0.0207076	0.72001	1	134	0.0930586	0.284862	1	134	0.0367205	0.478959	1	89
PC.ae.C38.4	135	0.0253341	0.77027	1	135	-0.00263615	0.936394	1	135	-0.0248342	0.774948	1	135	0.00333838	0.931647	1	136	0.030662	0.723069	1	136	-0.0100333	0.817924	1	132	0.020613	0.814521	1	132	0.0377308	0.592731	1	135	0.0471686	0.586953	1	135	0.0252534	0.359336	1	134	0.028135	0.746923	1	134	0.00514323	0.842829	1	89
PC.ae.C38.5	135	0.0681153	0.431987	1	135	0.00963755	0.775151	1	135	-0.0529339	0.542031	1	135	-0.0530718	0.196471	1	136	-0.0608111	0.481882	1	136	-0.00751933	0.868473	1	132	0.0269448	0.759084	1	132	0.0180131	0.81181	1	135	0.0311458	0.719892	1	135	0.0293352	0.302941	1	134	-0.0020499	0.981246	1	134	-0.00955708	0.729345	1	89
PC.ae.C38.6	135	0.0968101	0.263634	1	135	0.00418853	0.807682	1	135	-0.0312994	0.718568	1	135	-0.0275803	0.173542	1	136	-0.0951514	0.270502	1	136	-0.0135771	0.55669	1	132	0.00502215	0.954424	1	132	-0.00975803	0.793396	1	135	0.0334334	0.70027	1	135	0.0265725	0.0641212	1	134	-0.0252871	0.771798	1	134	-0.0152495	0.26211	1	89
PC.ae.C40.0	135	0.151375	0.0796955	1	135	0.017889	0.561528	1	135	0.0064823	0.940519	1	135	-0.0192606	0.59295	1	136	-0.0187374	0.828586	1	136	-0.00873262	0.832727	1	132	0.0287189	0.743756	1	132	0.000738571	0.991052	1	135	0.0613087	0.479949	1	135	0.0414759	0.106852	1	134	-0.0484869	0.577974	1	134	-0.0317063	0.18582	1	89
PC.ae.C40.1	135	0.0807872	0.35117	1	135	0.0121619	0.441788	1	135	0.0947884	0.274146	1	135	0.0208495	0.262231	1	136	0.0782818	0.364999	1	136	0.00317531	0.885304	1	132	0.0852357	0.33118	1	132	0.0175964	0.603698	1	135	0.00949908	0.912928	1	135	0.00967005	0.489293	1	134	-0.0039427	0.963938	1	134	-0.00685051	0.589376	1	89
PC.ae.C40.2	135	0.12171	0.159479	1	135	0.0326007	0.412135	1	135	0.0317433	0.714749	1	135	0.00877939	0.837758	1	136	0.00645252	0.940569	1	136	-0.0332426	0.512269	1	132	-0.0668716	0.446155	1	132	-0.0508806	0.518497	1	135	0.0351795	0.685423	1	135	-0.0155071	0.633012	1	134	0.0290403	0.739069	1	134	-0.00209609	0.942537	1	89
PC.ae.C40.3	135	0.0674373	0.436592	1	135	0.0101317	0.862088	1	135	-0.0569165	0.512022	1	135	-0.0508299	0.4433	1	136	0.0397051	0.646275	1	136	-0.0474136	0.524201	1	132	-0.0108948	0.901327	1	132	0.00150438	0.990216	1	135	-0.0575286	0.507487	1	135	-0.030318	0.523794	1	134	0.0355391	0.683516	1	134	0.00846441	0.849519	1	89
PC.ae.C40.4	135	0.037011	0.669604	1	135	-0.00357665	0.889555	1	135	-0.045542	0.59993	1	135	-0.0124351	0.671505	1	136	0.0231599	0.788983	1	136	-0.0119656	0.716368	1	132	-0.00946773	0.914199	1	132	-0.00390337	0.942812	1	135	-0.0302507	0.72762	1	135	-0.00524956	0.805376	1	134	0.037599	0.666239	1	134	-0.00158892	0.936306	1	89
PC.ae.C40.5	134	0.168424	0.0518327	1	134	0.0397021	0.284778	1	134	0.000289281	0.997353	1	134	-0.0382514	0.403835	1	135	-0.143302	0.0972961	1	135	-0.0569474	0.253107	1	131	-0.0248441	0.778195	1	131	-0.0108601	0.896515	1	134	0.0386863	0.657189	1	134	0.0552472	0.0781691	1	133	0.0526725	0.547086	1	133	0.0165503	0.588559	1	88
PC.ae.C40.6	133	0.17456	0.0445873	1	133	0.0147991	0.275248	1	133	0.0371758	0.670959	1	133	-0.0034138	0.843755	1	134	-0.154245	0.075165	1	134	-0.0190562	0.300635	1	130	-0.0295269	0.738772	1	130	-0.00788179	0.798303	1	133	0.08312	0.34151	1	133	0.0302868	0.00799104	1	132	0.024067	0.784148	1	132	0.000229395	0.984128	1	88
PC.ae.C42.0	135	0.0490635	0.571555	1	135	0.00803803	0.503484	1	135	0.0350893	0.686188	1	135	0.00546655	0.716833	1	136	0.045337	0.600205	1	136	0.00911927	0.581857	1	132	-0.00786325	0.928697	1	132	0.00302632	0.912441	1	135	0.0113648	0.895915	1	135	0.00558033	0.594204	1	134	-0.0259879	0.765655	1	134	-0.00195547	0.84817	1	89
PC.ae.C42.1	135	0.05737	0.508188	1	135	0.0149662	0.457287	1	135	0.0883525	0.308198	1	135	0.0334591	0.170491	1	136	0.156576	0.0687042	1	136	0.0352308	0.212682	1	132	0.0560263	0.523426	1	132	0.0327657	0.475332	1	135	-0.0153424	0.85981	1	135	0.00307553	0.864478	1	134	0.0199903	0.818667	1	134	-0.00910536	0.585313	1	89
PC.ae.C42.2	135	0.0323676	0.70905	1	135	0.00328623	0.660098	1	135	0.0661351	0.445995	1	135	0.00809457	0.35857	1	136	0.075603	0.381688	1	136	0.00400884	0.698269	1	132	0.0795013	0.364858	1	132	0.0107379	0.506314	1	135	0.00358502	0.967083	1	135	0.00397393	0.545223	1	134	0.0179728	0.836699	1	134	0.00172105	0.775047	1	89
PC.ae.C42.3	135	0.143269	0.0973493	1	135	0.0106394	0.320054	1	135	0.0649084	0.454494	1	135	0.00468972	0.738968	1	136	-0.0347053	0.688336	1	136	-0.00400015	0.791067	1	132	-0.0525017	0.549924	1	132	-0.0160587	0.520446	1	135	0.0220174	0.799904	1	135	0.0088291	0.355984	1	134	0.0200776	0.817889	1	134	-0.00299683	0.752158	1	89
PC.ae.C42.4	133	0.125029	0.151431	1	133	0.00505163	0.350867	1	133	-0.00116557	0.989376	1	133	0.000647089	0.923039	1	134	0.00856877	0.921723	1	134	-0.00356771	0.606828	1	130	0.0182662	0.836578	1	130	0.0016278	0.895696	1	133	-0.0113012	0.897274	1	133	0.00143276	0.749751	1	132	0.04199	0.632614	1	132	0.00101149	0.82343	1	88
PC.ae.C42.5	134	0.174558	0.0437818	1	134	0.0161041	0.262091	1	134	-0.0447039	0.608026	1	134	-0.0237582	0.170745	1	135	-0.147811	0.087108	1	135	-0.0246482	0.202162	1	131	-0.0313541	0.722206	1	131	-0.0128929	0.688184	1	134	0.0218706	0.801946	1	134	0.0154049	0.206377	1	133	-0.00742954	0.932362	1	133	-0.00639944	0.585186	1	88
PC.ae.C42.6	135	0.123178	0.154477	1	135	0.00161376	0.807188	1	135	-0.0262292	0.762672	1	135	-0.00665138	0.414623	1	136	-0.0991995	0.250551	1	136	-0.00557755	0.53851	1	132	-0.0314974	0.719951	1	132	-0.0107499	0.474704	1	135	0.069047	0.426181	1	135	0.00581108	0.309405	1	134	0.0178656	0.83766	1	134	-0.00374145	0.495111	1	89
Phe	115	0.0583506	0.535631	1	115	-0.0118277	0.969344	1	123	0.146762	0.105268	1	123	0.529052	0.167986	1	116	-0.19089	0.0401111	1	116	-0.335391	0.429316	1	120	-0.0636888	0.489518	1	120	-0.376125	0.590241	1	116	-0.0671658	0.473761	1	116	-0.367776	0.143313	1	122	0.0863737	0.344161	1	122	-0.0273168	0.917702	1	89
Pro	115	0.0374605	0.691021	1	115	-0.327226	0.695715	1	122	0.156769	0.0846319	1	122	1.0604	0.230729	1	116	-0.128897	0.167898	1	116	-1.19742	0.305437	1	119	0.000933022	0.991965	1	119	-0.685342	0.666479	1	115	-0.173534	0.0636374	1	115	-1.52701	0.0241311	1	121	0.0294046	0.748845	1	121	0.0606999	0.92178	1	88
Ser	116	0.0594898	0.525854	1	116	-0.194335	0.839281	1	123	0.120486	0.184357	1	123	1.4416	0.159832	1	117	-0.212247	0.0215962	1	117	-1.75399	0.190299	1	120	-0.10057	0.274422	1	120	-1.40601	0.453832	1	116	-0.117607	0.208637	1	116	-1.62001	0.0389427	1	122	-0.0221674	0.808504	1	122	-0.428112	0.547472	1	89
SM.a.C30.1	135	0.0856697	0.322751	1	135	0.00114166	0.708711	1	135	-0.0369842	0.670204	1	135	-0.00182749	0.60749	1	136	-0.0122681	0.887274	1	136	-0.00217735	0.600575	1	132	0.168802	0.0530093	1	132	0.0128106	0.0474577	1	135	0.089567	0.301569	1	135	0.00233897	0.365018	1	134	0.0537115	0.537647	1	134	-0.000314656	0.89619	1	89
SM.a.C32.1	135	0.044103	0.611093	1	135	0.0135949	0.709009	1	135	-0.0125573	0.885065	1	135	0.00791772	0.8457	1	136	-0.041778	0.629149	1	136	-0.0395922	0.423049	1	132	0.147578	0.0912814	1	132	0.124087	0.092286	1	135	0.0892475	0.303303	1	135	0.0467134	0.128394	1	134	0.0701182	0.420783	1	134	-0.00488274	0.858374	1	89
SM.a.C32.2	135	0.0602917	0.486802	1	135	0.001497	0.579315	1	135	0.00502878	0.953839	1	135	-0.000129668	0.967215	1	136	-0.0182698	0.8328	1	136	-0.00269636	0.456639	1	132	0.191823	0.0275654	1	132	0.0118745	0.0359055	1	135	0.0244976	0.777919	1	135	0.00190412	0.400263	1	134	0.0014489	0.986744	1	134	-0.000186445	0.93041	1	89
SM.a.C33.1	135	0.0171252	0.843533	1	135	0.00428428	0.808763	1	135	-0.0180007	0.835837	1	135	0.00387297	0.855602	1	136	-0.201343	0.0187488	1	136	-0.0579349	0.0118258	1	132	-0.0519721	0.553961	1	132	-0.00540773	0.88973	1	135	0.0507951	0.558497	1	135	0.0140947	0.345192	1	134	0.0243544	0.779997	1	134	-0.0119679	0.401412	1	89
SM.a.C33.2	135	-0.0793142	0.360044	1	135	-0.000178406	0.801565	1	135	-0.0466443	0.591122	1	135	0.000301339	0.732489	1	136	-0.025958	0.764196	1	136	-0.000162675	0.862298	1	132	-0.0515364	0.557293	1	132	-0.00063392	0.691731	1	135	-0.0234953	0.786784	1	135	-0.000497814	0.398527	1	134	-0.0699611	0.421827	1	134	-0.00062157	0.295335	1	89
SM.a.C34.0	135	0.0914301	0.291189	1	135	0.0125873	0.294728	1	135	0.0180031	0.835815	1	135	0.00946232	0.498264	1	136	0.0845936	0.327494	1	136	0.0142863	0.362168	1	132	0.0889821	0.310289	1	132	0.0288165	0.258623	1	135	0.0364575	0.674633	1	135	0.0217354	0.0271742	1	134	-0.0401028	0.645474	1	134	-0.0101588	0.276337	1	89
SM.a.C34.1	134	0.0249105	0.774836	1	134	0.148262	0.662017	1	134	-0.000396514	0.996372	1	134	0.128093	0.744509	1	135	-0.0253807	0.770132	1	135	-0.284272	0.522354	1	131	0.0169409	0.847701	1	131	0.327144	0.646679	1	134	0.0917245	0.291854	1	134	0.504576	0.07046	1	133	0.0136068	0.876469	1	133	-0.0416293	0.875112	1	89
SM.a.C34.2	134	-0.0458884	0.598109	1	134	0.00394568	0.919708	1	134	-0.0605046	0.48739	1	134	-0.00240246	0.959259	1	135	0.0535026	0.537693	1	135	-0.00426218	0.935653	1	131	0.0785654	0.372402	1	131	0.092887	0.276852	1	134	0.00175813	0.983915	1	134	0.0264051	0.429113	1	133	-0.0170805	0.845285	1	133	0.00632313	0.842412	1	89
SM.a.C35.0	134	0.0398883	0.646845	1	134	0.000851272	0.777394	1	134	0.0238781	0.784193	1	134	0.00235248	0.49943	1	135	0.0905506	0.29627	1	135	0.000102279	0.978821	1	131	0.140809	0.108672	1	131	0.00920429	0.143387	1	134	0.0673376	0.439484	1	134	0.00493963	0.0420917	1	133	0.0386397	0.658798	1	133	0.00108701	0.643358	1	89
SM.a.C35.1	135	0.0473417	0.585142	1	135	0.00900383	0.394745	1	135	-0.00611648	0.94387	1	135	0.00863814	0.494032	1	136	-0.129792	0.132059	1	136	-0.0266722	0.0544459	1	132	0.0412912	0.638292	1	132	0.00993923	0.665752	1	135	0.069664	0.422049	1	135	0.0103336	0.246352	1	134	-0.00765846	0.930017	1	134	-0.00462394	0.587004	1	89
SM.a.C36.0	135	0.0457468	0.597858	1	135	0.00324116	0.770849	1	135	0.10249	0.23686	1	135	0.0202481	0.0987712	1	136	0.0066362	0.93888	1	136	0.00338535	0.815923	1	132	0.152741	0.0803868	1	132	0.0303796	0.167394	1	135	0.0774047	0.372212	1	135	0.0223205	0.0144695	1	134	0.00580058	0.946965	1	134	0.00333224	0.68838	1	89
SM.a.C36.1	134	0.00792279	0.927532	1	134	0.00559144	0.946389	1	134	-0.0427263	0.624005	1	134	0.063561	0.503935	1	135	-0.0164693	0.849631	1	135	-0.077508	0.473807	1	131	0.0501473	0.569479	1	131	0.15076	0.381747	1	134	0.058906	0.498986	1	134	0.079421	0.25242	1	133	0.0154457	0.859935	1	133	0.0144714	0.822103	1	89
SM.a.C36.2	134	-0.00466589	0.957293	1	134	0.0046908	0.898752	1	134	-0.0881134	0.311346	1	134	0.00809951	0.848165	1	135	0.0204128	0.814213	1	135	-0.0166552	0.724611	1	131	0.0938621	0.286261	1	131	0.0972401	0.202219	1	134	-0.0025761	0.976433	1	134	0.00351117	0.908035	1	133	-0.0125611	0.885895	1	133	0.0116808	0.680829	1	89
SM.a.C36.3	135	-0.0207394	0.81107	1	135	-0.000461399	0.87881	1	135	-0.070581	0.415951	1	135	-0.00055161	0.875735	1	136	0.0634279	0.463191	1	136	-0.00109352	0.786328	1	132	0.161332	0.0645932	1	132	0.0123616	0.048362	1	135	0.0423667	0.625622	1	135	0.00159355	0.529482	1	134	-0.0737092	0.397327	1	134	-0.000245815	0.917483	1	89
SM.a.C36.4	135	-0.0564433	0.515072	1	135	-0.000462812	0.278181	1	135	-0.132975	0.124171	1	135	-0.000681081	0.164322	1	136	0.106849	0.215674	1	136	0.000350654	0.532923	1	132	0.185702	0.0330198	1	132	0.00235276	0.0070699	1	135	-0.003307	0.969635	1	135	0.00017114	0.626291	1	134	-0.0628063	0.470948	1	134	-0.000329005	0.32272	1	89
SM.a.C37.1	135	0.00112184	0.989705	1	135	0.000168122	0.980881	1	135	-0.0485734	0.575852	1	135	-0.00077111	0.924195	1	136	-0.118125	0.170796	1	136	-0.0170909	0.0591132	1	132	-0.000540044	0.995097	1	132	0.000220515	0.988111	1	135	0.031892	0.71347	1	135	0.0044786	0.445622	1	134	0.0136137	0.875938	1	134	-0.00370078	0.49775	1	89
SM.a.C38.1	135	0.0680763	0.432251	1	135	0.0453438	0.529669	1	135	0.0522828	0.547018	1	135	-0.0158595	0.838331	1	136	-0.0253306	0.769733	1	136	-0.0420457	0.668197	1	132	0.149837	0.0863777	1	132	0.183321	0.206175	1	135	0.160904	0.0622771	1	135	0.104481	0.0908048	1	134	0.110401	0.204123	1	134	-0.00216453	0.967393	1	89
SM.a.C38.2	134	0.0531403	0.541523	1	134	0.014897	0.613211	1	134	0.0131947	0.879727	1	134	-0.00671229	0.844355	1	135	0.0521296	0.548195	1	135	-0.00353021	0.928899	1	131	0.082086	0.351292	1	131	0.0416314	0.499624	1	134	0.176808	0.0409877	1	134	0.0682126	0.00487355	0.896733	133	0.0471558	0.589891	1	133	0.00869293	0.703485	1	88
SM.a.C38.3	135	0.144898	0.0935727	1	135	0.000720468	0.531222	1	135	0.0552776	0.524267	1	135	0.000928261	0.48627	1	136	0.0579153	0.50303	1	136	0.00136414	0.37856	1	132	-0.0114114	0.896674	1	132	0.000142203	0.953988	1	135	0.13926	0.107209	1	135	0.00131084	0.181959	1	134	0.0607988	0.485271	1	134	0.000113087	0.900116	1	89
SM.a.C38.4	135	0.00566774	0.947934	1	135	-5.22549e-05	0.868452	1	135	0.0310458	0.720754	1	135	0.000296479	0.422676	1	136	0.0044297	0.95918	1	136	-9.45477e-05	0.82341	1	132	0.128909	0.14072	1	132	0.000909761	0.172519	1	135	0.153012	0.076435	1	135	0.000434821	0.09942	1	134	-0.0583175	0.503292	1	134	-0.000197333	0.427257	1	89
SM.a.C39.1	135	0.110082	0.203459	1	135	0.00776087	0.665075	1	135	0.0336212	0.698668	1	135	0.0071166	0.722927	1	136	-0.0526841	0.542426	1	136	-0.0282443	0.234159	1	132	0.0584265	0.50576	1	132	0.0204928	0.578137	1	135	0.11543	0.182476	1	135	0.0187717	0.211049	1	134	0.09856	0.25722	1	134	-0.00218209	0.871904	1	89
SM.a.C39.2	134	0.0422075	0.627813	1	134	0.00376325	0.446992	1	134	-0.00794026	0.927449	1	134	0.0010561	0.855764	1	135	0.0514052	0.553775	1	135	-0.000997021	0.882244	1	131	0.0847897	0.3356	1	131	0.00470979	0.645783	1	134	0.0783801	0.368013	1	134	0.00748665	0.0738385	1	133	-0.0152008	0.862133	1	133	-0.00234904	0.540547	1	88
SM.a.C40.1	135	0.133767	0.121837	1	135	0.0512497	0.4329	1	135	-0.0084309	0.922688	1	135	-0.0115064	0.879821	1	136	0.0125878	0.884357	1	136	-0.0246748	0.769883	1	132	0.043334	0.621754	1	132	0.134991	0.32976	1	135	0.128514	0.137415	1	135	0.0903233	0.0892278	1	134	0.0429033	0.622567	1	134	-0.00151382	0.976364	1	89
SM.a.C40.2	135	0.0956882	0.269228	1	135	0.0525505	0.498032	1	135	-0.0266999	0.758543	1	135	-0.0704293	0.436481	1	136	0.00512146	0.952813	1	136	-0.0675833	0.516264	1	132	0.0444167	0.613064	1	132	0.0664745	0.687194	1	135	0.131226	0.129241	1	135	0.101698	0.11772	1	134	0.0278009	0.749829	1	134	-0.0304012	0.617061	1	89
SM.a.C40.3	134	0.0650906	0.454453	1	134	0.0144639	0.394387	1	134	-0.0347461	0.690212	1	134	-0.0122919	0.538899	1	135	-0.0056556	0.948093	1	135	-0.00410735	0.855557	1	131	0.0760137	0.388177	1	131	0.0391571	0.275249	1	134	0.135533	0.118424	1	134	0.0330065	0.0173778	1	133	-0.0433224	0.620505	1	133	-0.000469917	0.972014	1	88
SM.a.C40.4	135	0.0372793	0.667351	1	135	0.00137566	0.747837	1	135	-0.0347406	0.689145	1	135	-0.00569735	0.292123	1	136	0.0284316	0.742478	1	136	0.00110074	0.847541	1	132	0.0647427	0.460796	1	132	0.00829116	0.402172	1	135	0.0668399	0.441152	1	135	0.00575179	0.107077	1	134	0.0360554	0.679171	1	134	0.00142425	0.692475	1	89
SM.a.C40.5	133	0.11039	0.205623	1	133	0.00122992	0.401322	1	133	-0.0523281	0.549712	1	133	-0.00114931	0.522369	1	134	-0.0610011	0.483817	1	134	-5.99783e-05	0.975657	1	130	0.0192822	0.827626	1	130	0.00213638	0.513973	1	133	0.0525551	0.54798	1	133	0.0013397	0.31372	1	132	0.0576851	0.511184	1	132	0.000342401	0.776441	1	87
SM.a.C41.1	135	0.156492	0.0699488	1	135	0.035063	0.212756	1	135	0.0458566	0.59741	1	135	0.0247171	0.459638	1	136	-0.0714596	0.408396	1	136	-0.0522	0.14619	1	132	0.0307982	0.725917	1	132	0.0339812	0.575757	1	135	0.149693	0.0831172	1	135	0.0572493	0.0113783	1	134	0.0312074	0.720377	1	134	-0.00971784	0.665316	1	89
SM.a.C41.2	134	0.103575	0.233358	1	134	0.0142759	0.440356	1	134	0.00563599	0.948468	1	134	0.0124609	0.554376	1	135	-0.122211	0.157932	1	135	-0.0369317	0.127188	1	131	0.0531688	0.546416	1	131	0.0320241	0.404849	1	134	0.0997046	0.251708	1	134	0.0187258	0.229152	1	133	0.0136553	0.876032	1	133	-0.00700704	0.621699	1	89
SM.a.C42.1	135	0.172091	0.0460579	1	135	0.0999601	0.124864	1	135	0.0547581	0.528178	1	135	0.0124525	0.875475	1	136	0.106255	0.218251	1	136	0.0939297	0.284565	1	132	0.125142	0.152798	1	132	0.134978	0.340716	1	135	0.102139	0.238479	1	135	0.129881	0.0175064	1	134	0.0383646	0.659862	1	134	0.0100955	0.849476	1	89
SM.a.C42.2	135	0.13447	0.119877	1	135	0.114831	0.412307	1	135	0.000768219	0.992944	1	135	-0.071839	0.654328	1	136	-0.0600287	0.487548	1	136	-0.0402517	0.830701	1	132	0.0271848	0.757005	1	132	0.0364042	0.90161	1	135	0.112106	0.195483	1	135	0.212617	0.0695329	1	134	-0.00783801	0.92838	1	134	-0.0777946	0.470895	1	89
SM.a.C42.3	135	0.0883182	0.307974	1	135	0.0466831	0.514582	1	135	-0.0793924	0.360022	1	135	-0.083723	0.301624	1	136	-0.0187517	0.828457	1	136	-0.0489603	0.600427	1	132	0.0706206	0.421018	1	132	0.0706649	0.632925	1	135	0.0210809	0.808248	1	135	0.054841	0.351209	1	134	-0.0314643	0.718172	1	134	-0.0474526	0.383695	1	89
SM.a.C42.4	134	-0.0474844	0.585429	1	134	-0.0126083	0.460889	1	132	-0.110165	0.208574	1	132	-0.0357137	0.0876615	1	135	0.0469178	0.588946	1	135	0.000153862	0.994607	1	129	0.0522004	0.55686	1	129	0.0183499	0.635568	1	134	-0.0118854	0.891584	1	134	0.0176622	0.214721	1	131	-0.0573587	0.515211	1	131	-0.00536108	0.702801	1	88
SM.a.C42.5	134	0.0537239	0.537087	1	134	0.00255304	0.638956	1	134	-0.0308832	0.723163	1	134	-0.00508592	0.465528	1	135	-0.109532	0.206008	1	135	-0.00639511	0.379825	1	131	0.0317865	0.718535	1	131	0.000822889	0.947592	1	134	0.0156162	0.857869	1	134	0.00557057	0.22262	1	133	-0.0324829	0.710509	1	133	-0.00354132	0.443728	1	89
SM.a.C42.6	134	0.13752	0.113005	1	134	0.00575764	0.389214	1	134	0.0282049	0.746316	1	134	-0.0073194	0.368957	1	135	-0.0987519	0.25449	1	135	-0.00218101	0.808869	1	131	-0.00720127	0.934938	1	131	-0.0029213	0.843123	1	134	0.0403996	0.64303	1	134	0.00461161	0.449466	1	133	-0.0268693	0.758842	1	133	-0.00589678	0.277186	1	88
SM.a.C43.1	135	0.131104	0.129493	1	135	0.0076891	0.117418	1	135	0.0290167	0.73832	1	135	0.000891636	0.879048	1	136	0.0120797	0.888994	1	136	-0.000425465	0.946312	1	132	0.0877115	0.317275	1	132	0.00844468	0.428274	1	135	0.0394157	0.64991	1	135	0.00440979	0.27295	1	134	0.00352623	0.967745	1	134	-0.0019189	0.626655	1	89
SM.a.C43.2	135	0.171364	0.0469954	1	135	0.0223245	0.0249565	1	135	0.0325408	0.707904	1	135	0.00722474	0.531854	1	136	-0.122152	0.156575	1	136	-0.0218567	0.0913792	1	132	0.0513407	0.558793	1	132	0.0017944	0.93368	1	135	0.0770657	0.374316	1	135	0.00873189	0.298275	1	134	-0.0377237	0.665199	1	134	-0.00759219	0.333422	1	89
SM.a.C44.2	135	0.0459126	0.59653	1	135	0.00265889	0.530412	1	135	0.0207809	0.810925	1	135	0.00100467	0.843938	1	136	0.0681152	0.430734	1	136	0.00138243	0.810639	1	132	0.0318339	0.717085	1	132	0.000166536	0.985655	1	135	0.0392474	0.651307	1	135	0.00424286	0.238439	1	134	-0.065163	0.454433	1	134	-0.00421852	0.216226	1	89
SM.a.C44.5	135	0.0917715	0.289386	1	135	0.00266498	0.259445	1	133	-0.123321	0.157308	1	133	-0.00239896	0.374171	1	136	-0.0172346	0.842148	1	136	-0.00174626	0.577043	1	130	0.0311055	0.725351	1	130	0.00454069	0.354171	1	135	-0.0323262	0.709743	1	135	0.000619443	0.753452	1	132	0.0337329	0.70099	1	132	-0.000747552	0.679279	1	88
SM.a.C44.6	134	0.16173	0.0619796	1	134	0.00714855	0.0316618	1	134	0.0495643	0.569545	1	134	-0.00258864	0.548524	1	135	-0.041684	0.631207	1	135	0.00279334	0.537389	1	131	0.0424843	0.629939	1	131	-0.00173136	0.827433	1	134	0.0392998	0.652105	1	134	0.00225822	0.465145	1	133	-0.0378975	0.664952	1	133	-0.00226756	0.440939	1	88
SM.a.C46.6	134	0.0298732	0.731549	1	134	0.0043177	0.00257725	0.474215	133	0.149313	0.0862844	1	133	0.00301954	0.0408078	1	135	0.0910676	0.293509	1	135	0.000951985	0.635304	1	130	0.114	0.196545	1	130	0.000843662	0.751998	1	134	-0.087288	0.315918	1	134	-0.000122375	0.921174	1	132	0.103215	0.238907	1	132	0.00137645	0.16838	1	87
Thr	116	0.0418746	0.65537	1	116	-0.40258	0.472248	1	123	0.0953275	0.294257	1	123	0.163058	0.806275	1	117	-0.152269	0.101228	1	117	-1.02613	0.183166	1	120	-0.0448919	0.626355	1	120	-0.324531	0.787918	1	116	-0.0999245	0.285864	1	116	-0.487404	0.28627	1	122	0.0709839	0.437187	1	122	0.047628	0.916102	1	89
Trp	115	0.0724428	0.441663	1	115	-0.0851242	0.702745	1	123	0.193789	0.0317388	1	123	0.219276	0.373023	1	116	0.0141222	0.8804	1	116	-0.123084	0.679013	1	120	0.107982	0.24042	1	120	0.559787	0.201051	1	116	-0.0929401	0.321049	1	116	-0.0835072	0.634799	1	122	0.18354	0.0430089	1	122	0.187641	0.273363	1	88
Tyr	114	0.064273	0.496892	1	114	-0.0323315	0.916974	1	122	0.15001	0.0991056	1	122	0.27102	0.414193	1	115	-0.097206	0.301379	1	115	-0.301331	0.477301	1	119	0.0177849	0.84776	1	119	-0.306474	0.607877	1	115	-0.160121	0.0873767	1	115	-0.449355	0.0745747	1	121	0.113753	0.214116	1	121	0.120953	0.591561	1	88
Val	115	0.0993436	0.290822	1	115	-0.122878	0.853747	1	123	0.231189	0.0100885	1	123	1.49818	0.0474809	1	116	-0.198341	0.0328166	1	116	-0.947491	0.30604	1	120	0.0302324	0.743072	1	120	0.306069	0.823729	1	116	-0.123244	0.187493	1	116	-0.874157	0.112385	1	122	0.134562	0.139485	1	122	0.448759	0.39502	1	89
[truncated: 7 more columns]
